# Supplementary material for: Three tetracoordinate Co(ii) complexes [Co(biq)X2] (X = Cl, Br, I) with easy-plane magnetic anisotropy as field-induced single-molecule magnets
Source: Royal Society of Chemistry journal article supplement (doi:10.1039/c5dt02827b), 2015-01-01
Supplement: c5dt02827b1.pdf [file c5dt02827b1.pdf]

**FT-IR** (Nicolet 6700 FT-IR Spectrometer with SmartOrbit™ diamond ATR accessory in the range of 4000–400 cm<sup>-1</sup>):

**1:** 3116 (w), 3109 (w), 3086 (w), 3053 (w), 3018 (w), 1616 (w), 1593 (m), 1583 (m), 1552 (w), 1506 (s), 1471 (w), 1456 (w), 1432 (m), 1381 (m), 1364 (m), 1335 (m), 1316 (w), 1302 (m), 1214 (m), 1176 (m), 1163 (w), 1145 (s), 1135 (m), 1104 (m), 1049 (w), 997 (w), 973 (m), 956 (m), 891 (w), 872 (m), 833 (vs), 802 (w), 783 (vs), 747 (vs), 701 (m), 658 (m), 650 (m), 635 (m), 623 (m), 525 (w), 500 (m), 487 (s)

**2:** 3115 (w), 3108 (w), 3086 (w), 3053 (w), 3016 (w), 1616 (w), 1593 (m), 1582 (m), 1552 (w), 1506 (s), 1471 (w), 1454 (w), 1433 (m), 1381 (m), 1363 (m), 1334 (m), 1316 (w), 1301 (m), 1214 (m), 1174 (m), 1162 (w), 1144 (s), 1134 (m), 1103 (m), 1048 (w), 996 (m), 973 (m), 956 (m), 892 (w), 872 (m), 832 (vs), 802 (w), 783 (vs), 747 (vs), 700 (m), 658 (m), 649 (m), 635 (m), 622 (m), 525 (w), 500 (m), 487 (s)

**3:** 3113 (w), 3106 (w), 3080 (w), 3047 (w), 3012 (w), 1615 (w), 1593 (m), 1581 (m), 1552 (w), 1505 (s), 1471 (w), 1455 (w), 1429 (m), 1380 (m), 1362 (m), 1334 (m), 1315 (w), 1299 (m), 1213 (m), 1173 (m), 1162 (w), 1143 (s), 1134 (m), 1102 (m), 1047 (w), 992 (m), 973 (m), 954 (m), 891 (w), 870 (m), 830 (vs), 800 (w), 781 (vs), 745 (vs), 698 (m), 657 (m), 648 (m), 635 (m), 622 (m), 524 (w), 498 (m), 485 (s)

**Table S1** Crystal data and final refinement parameters for **1-3**

|                                                              | <b>1</b>                                                         | <b>2</b>                                                         | <b>3</b>                                                        |
|--------------------------------------------------------------|------------------------------------------------------------------|------------------------------------------------------------------|-----------------------------------------------------------------|
| Empirical formula                                            | C <sub>18</sub> H <sub>12</sub> N <sub>2</sub> CoCl <sub>2</sub> | C <sub>18</sub> H <sub>12</sub> N <sub>2</sub> CoBr <sub>2</sub> | C <sub>18</sub> H <sub>12</sub> N <sub>2</sub> CoI <sub>2</sub> |
| Formula weight M <sub>r</sub>                                | 386.1                                                            | 475.0                                                            | 569.1                                                           |
| Temperature                                                  | 120 K                                                            | 120 K                                                            | 120 K                                                           |
| Wavelength [Å]                                               | 1.54184                                                          | 1.54184                                                          | 1.54184                                                         |
| Crystal system                                               | Monoclinic                                                       | Monoclinic                                                       | Monoclinic                                                      |
| Space group                                                  | <i>P</i> 2 <sub>1</sub> / <i>c</i>                               | <i>P</i> 2 <sub>1</sub> / <i>c</i>                               | <i>P</i> 2 <sub>1</sub> / <i>c</i>                              |
| Unit cell dimensions                                         |                                                                  |                                                                  |                                                                 |
| <i>a</i> [Å]                                                 | 7.8402(3)                                                        | 7.7948(2)                                                        | 7.7734(2)                                                       |
| <i>b</i> [Å]                                                 | 12.2014(4)                                                       | 12.3160(3)                                                       | 12.5186(4)                                                      |
| <i>c</i> [Å]                                                 | 16.8762(6)                                                       | 17.2656(4)                                                       | 17.9276(7)                                                      |
| $\beta$ [°]                                                  | 104.098(4)                                                       | 102.812(2)                                                       | 101.346(3)                                                      |
| Volume [Å <sup>3</sup> ]                                     | 1565.78(10)                                                      | 1616.24(7)                                                       | 1710.48(10)                                                     |
| <i>Z</i>                                                     | 4                                                                | 4                                                                | 4                                                               |
| Density (calculated) [g/cm <sup>3</sup> ]                    | 1.6381                                                           | 1.9523                                                           | 2.2097                                                          |
| Absorption coefficient [mm <sup>-1</sup> ]                   | 11.714                                                           | 14.100                                                           | 36.194                                                          |
| Crystal dimensions [mm]                                      | 0.31×0.07×0.02                                                   | 0.65×0.07×0.04                                                   | 0.42×0.07×0.02                                                  |
| $\theta$ range for data collection [°]                       | 4.52 - 67.06                                                     | 4.45 - 66.9                                                      | 5 - 66.87                                                       |
| Reflections collected                                        | 12022                                                            | 19218                                                            | 13110                                                           |
| Independent reflections                                      | 2778                                                             | 2870                                                             | 3024                                                            |
| <i>R</i> (int)                                               | 0.0426                                                           | 0.0427                                                           | 0.0421                                                          |
| Completeness to $\theta_{\max}$ [%]                          | 0.99                                                             | 0.99                                                             | 0.99                                                            |
| Absorption correction                                        | Gaussian                                                         | Gaussian                                                         | Gaussian                                                        |
| Max. and min. transmission                                   | 0.234; 0.773                                                     | 0.098; 0.589                                                     | 0.053; 0.512                                                    |
| Data / restraints / parameters                               | 2778 / 0 / 208                                                   | 2870 / 0 / 208                                                   | 3024 / 0 / 208                                                  |
| Goodness-of-fit on F <sup>2</sup>                            | 1.01                                                             | 1.09                                                             | 1.47                                                            |
| Final <i>R</i> indices [ <i>I</i> > 2 $\sigma$ ( <i>I</i> )] |                                                                  |                                                                  |                                                                 |
| <i>R</i> 1                                                   | 0.0267                                                           | 0.0202                                                           | 0.0413                                                          |
| <i>wR</i> 2                                                  | 0.0302                                                           | 0.0247                                                           | 0.1040                                                          |
| Final <i>R</i> indices (all data)                            |                                                                  |                                                                  |                                                                 |
| <i>R</i> 1                                                   | 0.0318                                                           | 0.0226                                                           | 0.0470                                                          |
| <i>wR</i> 2                                                  | 0.0327                                                           | 0.0258                                                           | 0.1090                                                          |

**Table S2** Selected geometric parameters [Å, °] for **1-3**.

|           | <b>1</b> (X = Cl) | <b>2</b> (X = Br) | <b>3</b> (X = I) |
|-----------|-------------------|-------------------|------------------|
| Co1–N1    | 2.0311(19)        | 2.029(2)          | 2.031(6)         |
| Co1–N2    | 2.0362(17)        | 2.0378(19)        | 2.031(6)         |
| Co1–X1    | 2.2275(7)         | 2.3642(5)         | 2.5520(12)       |
| Co1–X2    | 2.2176(6)         | 2.3472(4)         | 2.5255(10)       |
| N1–Co1–N2 | 81.70(7)          | 81.88(8)          | 81.9(2)          |
| X1–Co1–X2 | 117.36(3)         | 117.864(18)       | 118.29(5)        |
| N1–Co1–X1 | 114.45(5)         | 114.21(6)         | 115.23(16)       |
| N1–Co1–X2 | 112.17(5)         | 112.30(5)         | 112.05(14)       |
| N2–Co1–X1 | 107.67(5)         | 108.53(6)         | 109.33(15)       |
| N2–Co1–X2 | 118.42(5)         | 116.78(6)         | 114.56(15)       |

**Table S3** Possible hydrogen bonding interactions [ $\text{\AA}$ ,  $^\circ$ ] for **1**

| D-H $\cdots$ A                      | d(D-H) | d(H $\cdots$ A) | d(D $\cdots$ A) | $\angle$ (DHA) |
|-------------------------------------|--------|-----------------|-----------------|----------------|
| C12-H1C12 $\cdots$ Cl2 <sup>i</sup> | 0.96   | 2.76            | 3.426(2)        | 128            |
| C22-H1C22 $\cdots$ Cl1 <sup>i</sup> | 0.96   | 2.77            | 3.603(2)        | 145            |

Symmetry codes: (i)  $x, 3/2 - y, -1/2 + z$ **Table S4** Possible hydrogen bonding interactions [ $\text{\AA}$ ,  $^\circ$ ] for **2**‡

| D-H $\cdots$ A                       | d(D-H) | d(H $\cdots$ A) | d(D $\cdots$ A) | $\angle$ (DHA) |
|--------------------------------------|--------|-----------------|-----------------|----------------|
| C12-H1C12 $\cdots$ Br2 <sup>ii</sup> | 0.96   | 2.83            | 3.531(2)        | 131            |

Symmetry codes: (ii)  $x, 1/2 - y, -1/2 + z$ 

‡ the shortest contact for the Br1 bromido ligand, C22-H1C22 $\cdots$ Br1<sup>ii</sup> ( $d(\text{H}\cdots\text{A}) = 2.99 \text{ \AA}$  and  $d(\text{D}\cdots\text{A}) = 3.783(2) \text{ \AA}$ ) is outside the usual range for hydrogen bonding interactions ( $d(\text{H}\cdots\text{Br}) \leq 2.88 \text{ \AA}$ ).

**Table S5** Possible hydrogen bonding interactions [ $\text{\AA}$ ,  $^\circ$ ] for **3**‡

| D-H $\cdots$ A                      | d(D-H) | d(H $\cdots$ A) | d(D $\cdots$ A) | $\angle$ (DHA) |
|-------------------------------------|--------|-----------------|-----------------|----------------|
| C12-H1C12 $\cdots$ I2 <sup>ii</sup> | 0.96   | 2.97            | 3.724(7)        | 137            |

Symmetry codes: (ii)  $x, 1/2 - y, -1/2 + z$ 

‡ the shortest contact for the I1 iodido ligand, C22-H1C22 $\cdots$ I1<sup>ii</sup> ( $d(\text{H}\cdots\text{A}) = 3.41 \text{ \AA}$  and  $d(\text{D}\cdots\text{A}) = 4.131(7) \text{ \AA}$ ) is outside the usual range for hydrogen bonding interactions ( $d(\text{H}\cdots\text{I}) \leq 3.03 \text{ \AA}$ ).

**Table S6** Possible  $\pi$ - $\pi$  interactions [ $\text{\AA}$ ,  $^\circ$ ] for **1**

| Cg(I)⋯Cg(J) ‡          | d(Cg⋯Cg)   | $\alpha$ | $\beta$ | $\gamma$ |
|------------------------|------------|----------|---------|----------|
| Cg1⋯Cg1 <sup>iii</sup> | 3.4941(12) | 0        | 20.40   | 20.40    |
| Cg1⋯Cg3 <sup>iii</sup> | 3.5788(13) | 0.66(11) | 24.25   | 23.59    |
| Cg2⋯Cg2 <sup>iv</sup>  | 3.7204(13) | 0        | 23.70   | 23.70    |
| Cg2⋯Cg4 <sup>iv</sup>  | 3.7172(14) | 0.15(11) | 23.82   | 23.87    |
| Cg4⋯Cg4 <sup>v</sup>   | 3.4891(14) | 0        | 14.26   | 14.26    |

Symmetry codes: (iii) 2 - x, 2 - y, - z; (iv) 2 - x, 1 - y, - z; (v) 1 - x, 1 - y, - z

**Table S7** Possible  $\pi$ - $\pi$  interactions [ $\text{\AA}$ ,  $^\circ$ ] for **2**

| Cg(I)⋯Cg(J) ‡          | d(Cg⋯Cg)   | $\alpha$ | $\beta$ | $\gamma$ |
|------------------------|------------|----------|---------|----------|
| Cg1⋯Cg1 <sup>v</sup>   | 3.4942(14) | 0        | 20.56   | 20.56    |
| Cg1⋯Cg3 <sup>v</sup>   | 3.6173(14) | 0.82(11) | 25.84   | 25.02    |
| Cg2⋯Cg2 <sup>vi</sup>  | 3.7187(14) | 0        | 22.28   | 22.28    |
| Cg2⋯Cg4 <sup>vi</sup>  | 3.6991(14) | 0.40(11) | 22.18   | 21.80    |
| Cg4⋯Cg4 <sup>vii</sup> | 3.4955(14) | 0        | 16.39   | 16.39    |

Symmetry codes: (v) 1 - x, 1 - y, - z; (vi) 1 - x, - y, - z; (vii) - x, - y, - z

**Table S8** Possible  $\pi$ - $\pi$  interactions [ $\text{\AA}$ ,  $^\circ$ ] for **3**

| Cg(I)⋯Cg(J) ‡           | d(Cg⋯Cg) | $\alpha$ | $\beta$ | $\gamma$ |
|-------------------------|----------|----------|---------|----------|
| Cg1⋯Cg1 <sup>iv</sup>   | 3.521(4) | 0        | 20.85   | 20.85    |
| Cg1⋯Cg3 <sup>iv</sup>   | 3.642(4) | 0.9(3)   | 25.86   | 25.07    |
| Cg2⋯Cg2 <sup>viii</sup> | 3.648(4) | 0        | 18.87   | 18.87    |
| Cg2⋯Cg4 <sup>viii</sup> | 3.663(4) | 0.4(3)   | 20.03   | 19.81    |
| Cg4⋯Cg4 <sup>vi</sup>   | 3.520(4) | 0        | 19.05   | 19.05    |

Symmetry codes: (iv) 2 - x, 1 - y, - z; (vi) 1 - x, - y, - z; (viii) 2 - x, - y, - z

‡Cg1 represents the centroid of the heterocyclic ring containing N1 atom

Cg2 represents the centroid of the heterocyclic ring containing N2 atom

Cg3 represents the centroid of the carbocyclic ring containing C18 atom

Cg4 represents the centroid of the carbocyclic ring containing C28 atom

 $\alpha$  denotes the dihedral angle between planes I and J; $\beta$  denotes the angle between the Cg(I)⋯Cg(J) vector and normal to plane I; $\gamma$  denotes the angle between the Cg(I)⋯Cg(J) vector and normal to plane J.

**Table S9** The shortest C...C contacts [Å] between carbon atoms of 2,2'-biquinoline for **1-3**

|                          | <b>1</b> |                         | <b>2</b> |                         | <b>3</b>  |  |
|--------------------------|----------|-------------------------|----------|-------------------------|-----------|--|
| C(I)...C(J)              | d(C...C) | C(I)...C(J)             | d(C...C) | C(I)...C(J)             | d(C...C)  |  |
| C11...C15 <sup>iii</sup> | 3.283(3) | C11...C15 <sup>v</sup>  | 3.279(3) | C11...C15 <sup>iv</sup> | 3.311(9)  |  |
| C13...C19 <sup>iii</sup> | 3.280(3) | C13...C19 <sup>v</sup>  | 3.269(3) | C13...C19 <sup>iv</sup> | 3.293(9)  |  |
| C15...C11 <sup>iii</sup> | 3.283(3) | C15...C11 <sup>v</sup>  | 3.279(3) | C15...C11 <sup>iv</sup> | 3.311(9)  |  |
| C19...C13 <sup>iii</sup> | 3.280(3) | C19...C13 <sup>v</sup>  | 3.269(3) | C19...C13 <sup>iv</sup> | 3.293(9)  |  |
| C11...C26 <sup>iv</sup>  | 3.324(3) | C11...C26 <sup>vi</sup> | 3.344(3) | C24...C26 <sup>vi</sup> | 3.341(10) |  |
| C22...C28 <sup>iv</sup>  | 3.399(3) | C22...C28 <sup>vi</sup> | 3.426(3) | C26...C24 <sup>vi</sup> | 3.341(10) |  |
| C26...C11 <sup>iv</sup>  | 3.324(3) | C26...C11 <sup>vi</sup> | 3.344(3) |                         |           |  |
| C28...C22 <sup>iv</sup>  | 3.399(3) | C28...C22 <sup>vi</sup> | 3.426(3) |                         |           |  |

Symmetry codes: (iii) 2 - x, 2 - y, - z; (iv) 2 - x, 1 - y, - z; (v) 1 - x, 1 - y, - z; (vi) 1 - x, - y, - z

Lukáš Smolko, Juraj Černák, Michal Dušek, Jozef Miklovič, Ján Titiš, Roman Boča

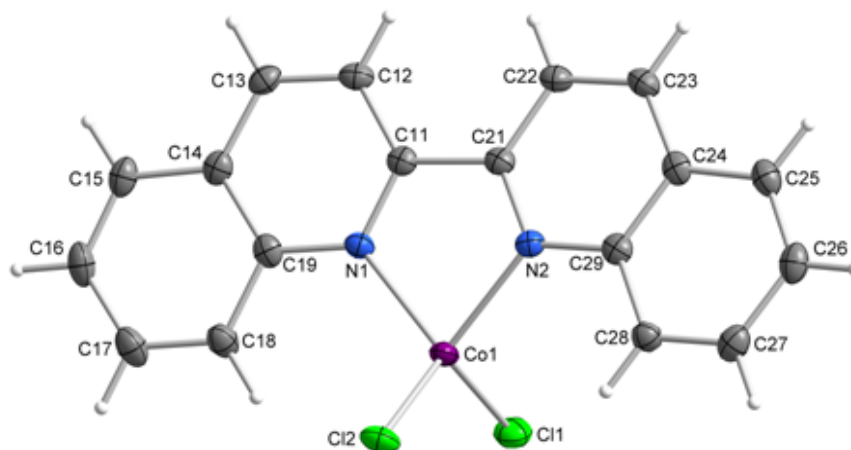

**Fig. S1** Thermal ellipsoid plot of **1** showing the numbering scheme. The ellipsoids are drawn at 50 % probability level.

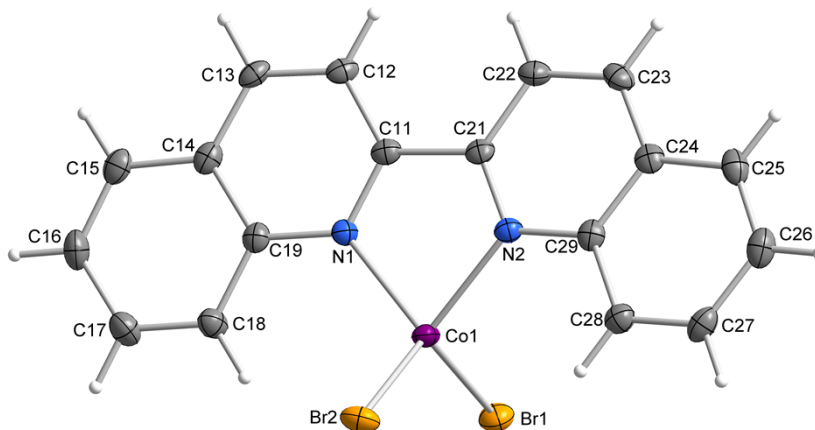

**Fig. S2** Thermal ellipsoid plot of **2** showing the numbering scheme. The ellipsoids are drawn at 50 % probability level.

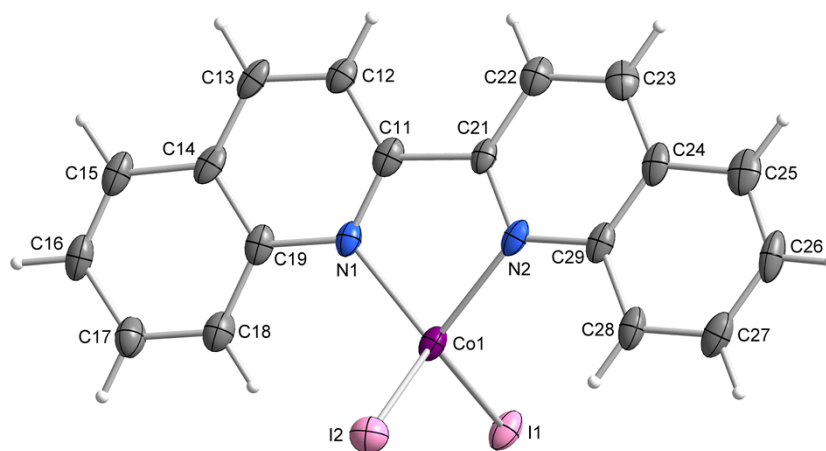

**Fig. S3** Thermal ellipsoid plot of **3** showing the numbering scheme. The ellipsoids are drawn at 50 % probability level.

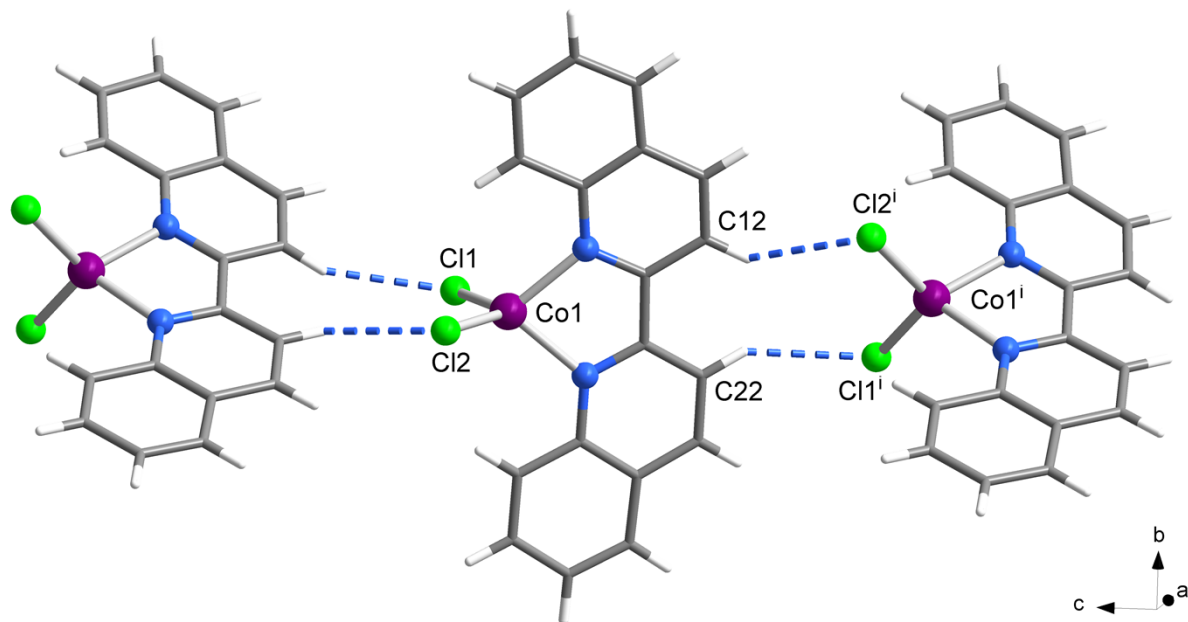

**Fig. S4** Chain-like arrangement formed by weak C-H...Cl hydrogen bonding interactions of the complex molecules in **1**. Symmetry codes: (i)  $x, 3/2 - y, -1/2 + z$

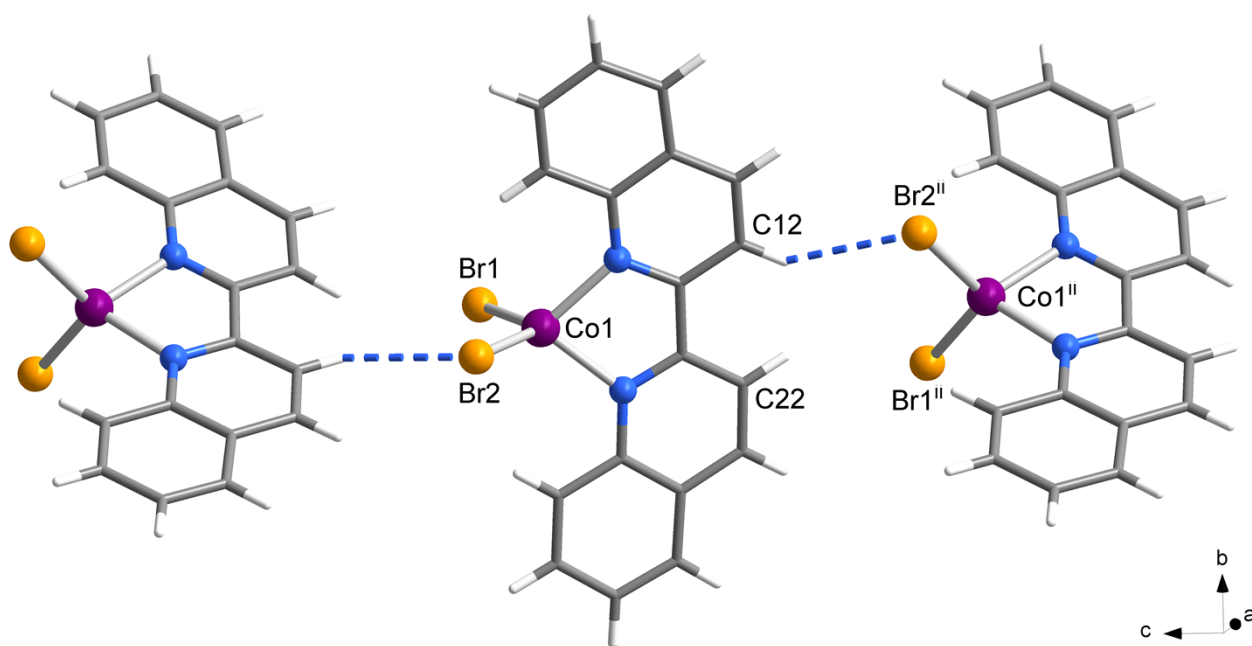

**Fig. S5** Chain-like arrangement formed by weak C-H...Br hydrogen bonding interactions of the complex molecules in **2**. Symmetry codes: (ii)  $x, 3/2 - y, -1/2 + z$

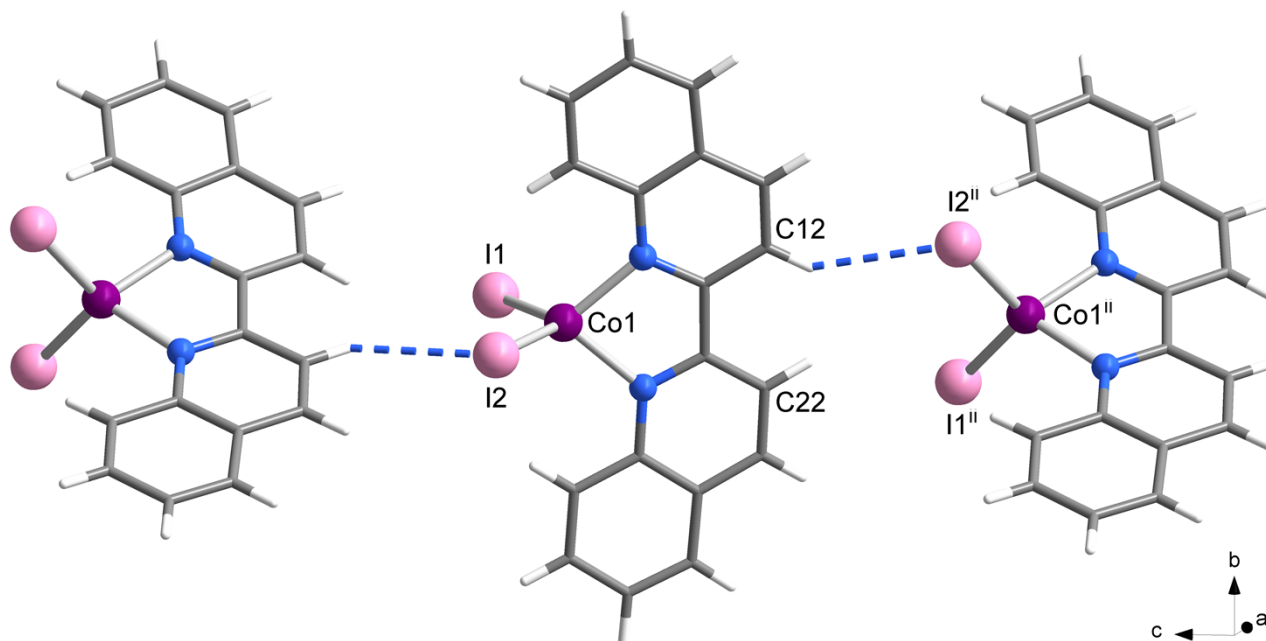

**Fig. S6** Chain-like arrangement formed by weak C-H...I hydrogen bonding interactions of the complex molecules in **3**. Symmetry codes: (ii)  $x, 3/2 - y, -1/2 + z$

**Table S10** The shortest C...C contacts [ $\text{\AA}$ ] between carbon atoms of 2,2'-biquinoline for **1-3**

| <b>1</b>                 |          | <b>2</b>                |          | <b>3</b>                |           |
|--------------------------|----------|-------------------------|----------|-------------------------|-----------|
| C(I)...C(J)              | d(C...C) | C(I)...C(J)             | d(C...C) | C(I)...C(J)             | d(C...C)  |
| C11...C15 <sup>iii</sup> | 3.283(3) | C11...C15 <sup>v</sup>  | 3.279(3) | C11...C15 <sup>iv</sup> | 3.311(9)  |
| C13...C19 <sup>iii</sup> | 3.280(3) | C13...C19 <sup>v</sup>  | 3.269(3) | C13...C19 <sup>iv</sup> | 3.293(9)  |
| C15...C11 <sup>iii</sup> | 3.283(3) | C15...C11 <sup>v</sup>  | 3.279(3) | C15...C11 <sup>iv</sup> | 3.311(9)  |
| C19...C13 <sup>iii</sup> | 3.280(3) | C19...C13 <sup>v</sup>  | 3.269(3) | C19...C13 <sup>iv</sup> | 3.293(9)  |
| C11...C26 <sup>iv</sup>  | 3.324(3) | C11...C26 <sup>vi</sup> | 3.344(3) | C24...C26 <sup>vi</sup> | 3.341(10) |
| C22...C28 <sup>iv</sup>  | 3.399(3) | C22...C28 <sup>vi</sup> | 3.426(3) | C26...C24 <sup>vi</sup> | 3.341(10) |
| C26...C11 <sup>iv</sup>  | 3.324(3) | C26...C11 <sup>vi</sup> | 3.344(3) |                         |           |
| C28...C22 <sup>iv</sup>  | 3.399(3) | C28...C22 <sup>vi</sup> | 3.426(3) |                         |           |

Symmetry codes: (iii)  $2 - x, 2 - y, -z$ ; (iv)  $2 - x, 1 - y, -z$ ; (v)  $1 - x, 1 - y, -z$ ; (vi)  $1 - x, -y, -z$



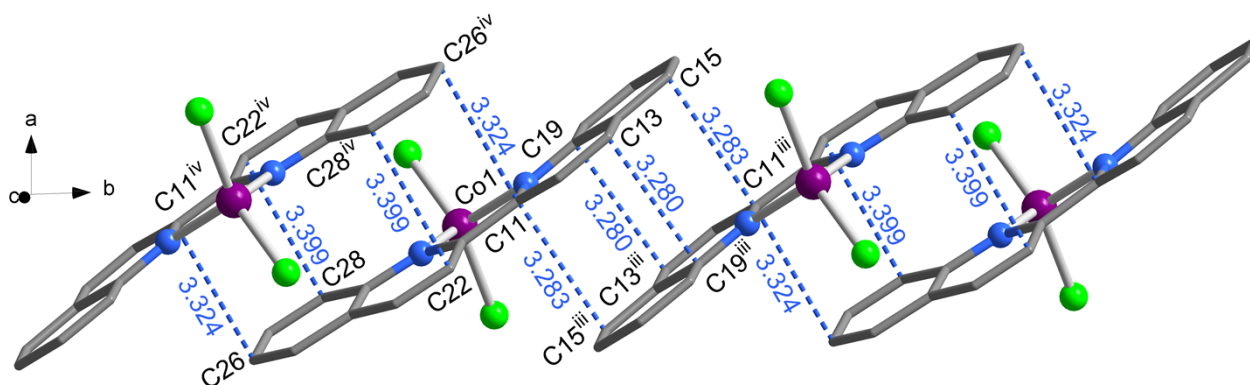

**Fig. S7** The shortest C...C contacts [Å] between carbon atoms of 2,2'-biquinoline present in the crystal structure of **1**. Hydrogen atoms are omitted for clarity. Symmetry codes: (iii)  $2 - x, 2 - y, -z$ ; (iv)  $2 - x, 1 - y, -z$

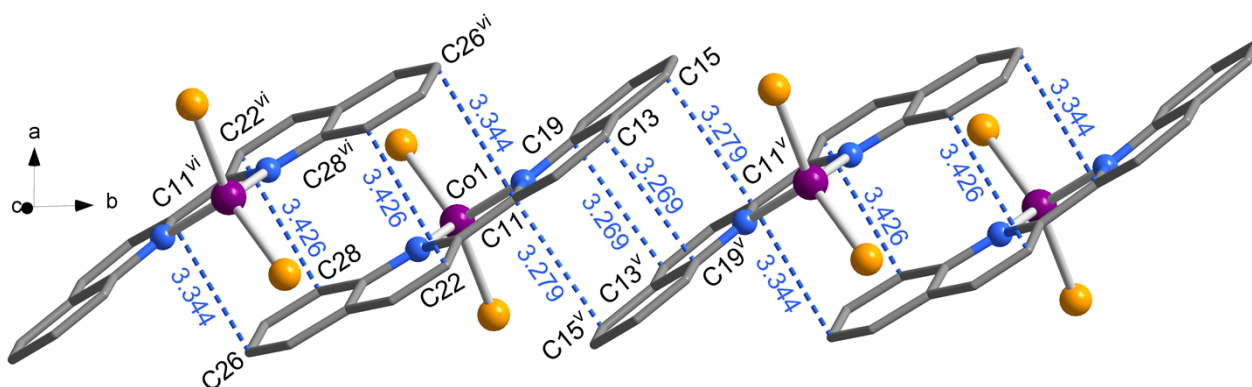

**Fig. S8** The shortest C...C contacts [Å] between carbon atoms of 2,2'-biquinoline present in the crystal structure of **2**. Hydrogen atoms are omitted for clarity. Symmetry codes: (v)  $1 - x, 1 - y, -z$ ; (vi)  $1 - x, -y, -z$ ;

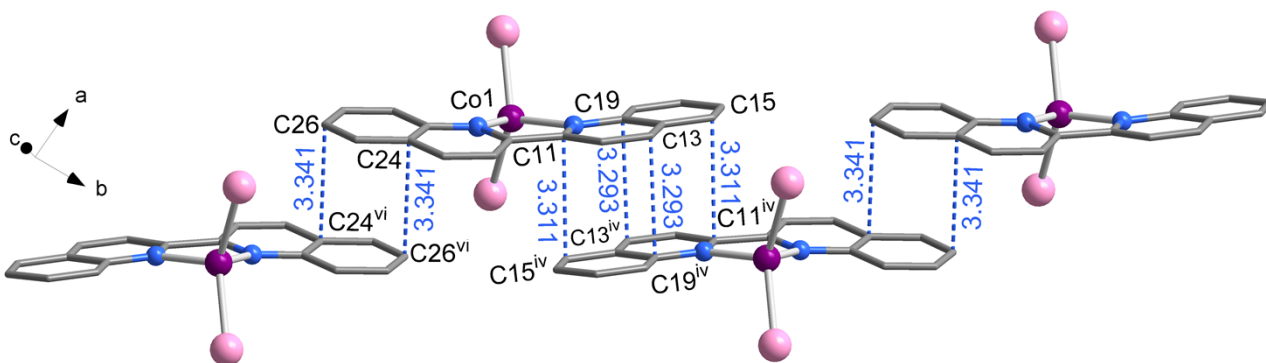

**Fig. S9** The shortest C...C contacts [Å] between carbon atoms of 2,2'-biquinoline present in the crystal structure of **3**. Hydrogen atoms are omitted for clarity. Symmetry codes: (iv)  $2 - x, 1 - y, -z$ ; (vi)  $1 - x, -y, -z$ ;

Three Tetracoordinate Co(II) Complexes [Co(biq)X<sub>2</sub>] (X = Cl, Br, I) with Easy-Plane Magnetic Anisotropy as Field-Induced Single-Molecule Magnets

Lukáš Smolko, Juraj Černák, Michal Dušek, Jozef Miklovič, Ján Titiš, Roman Boča

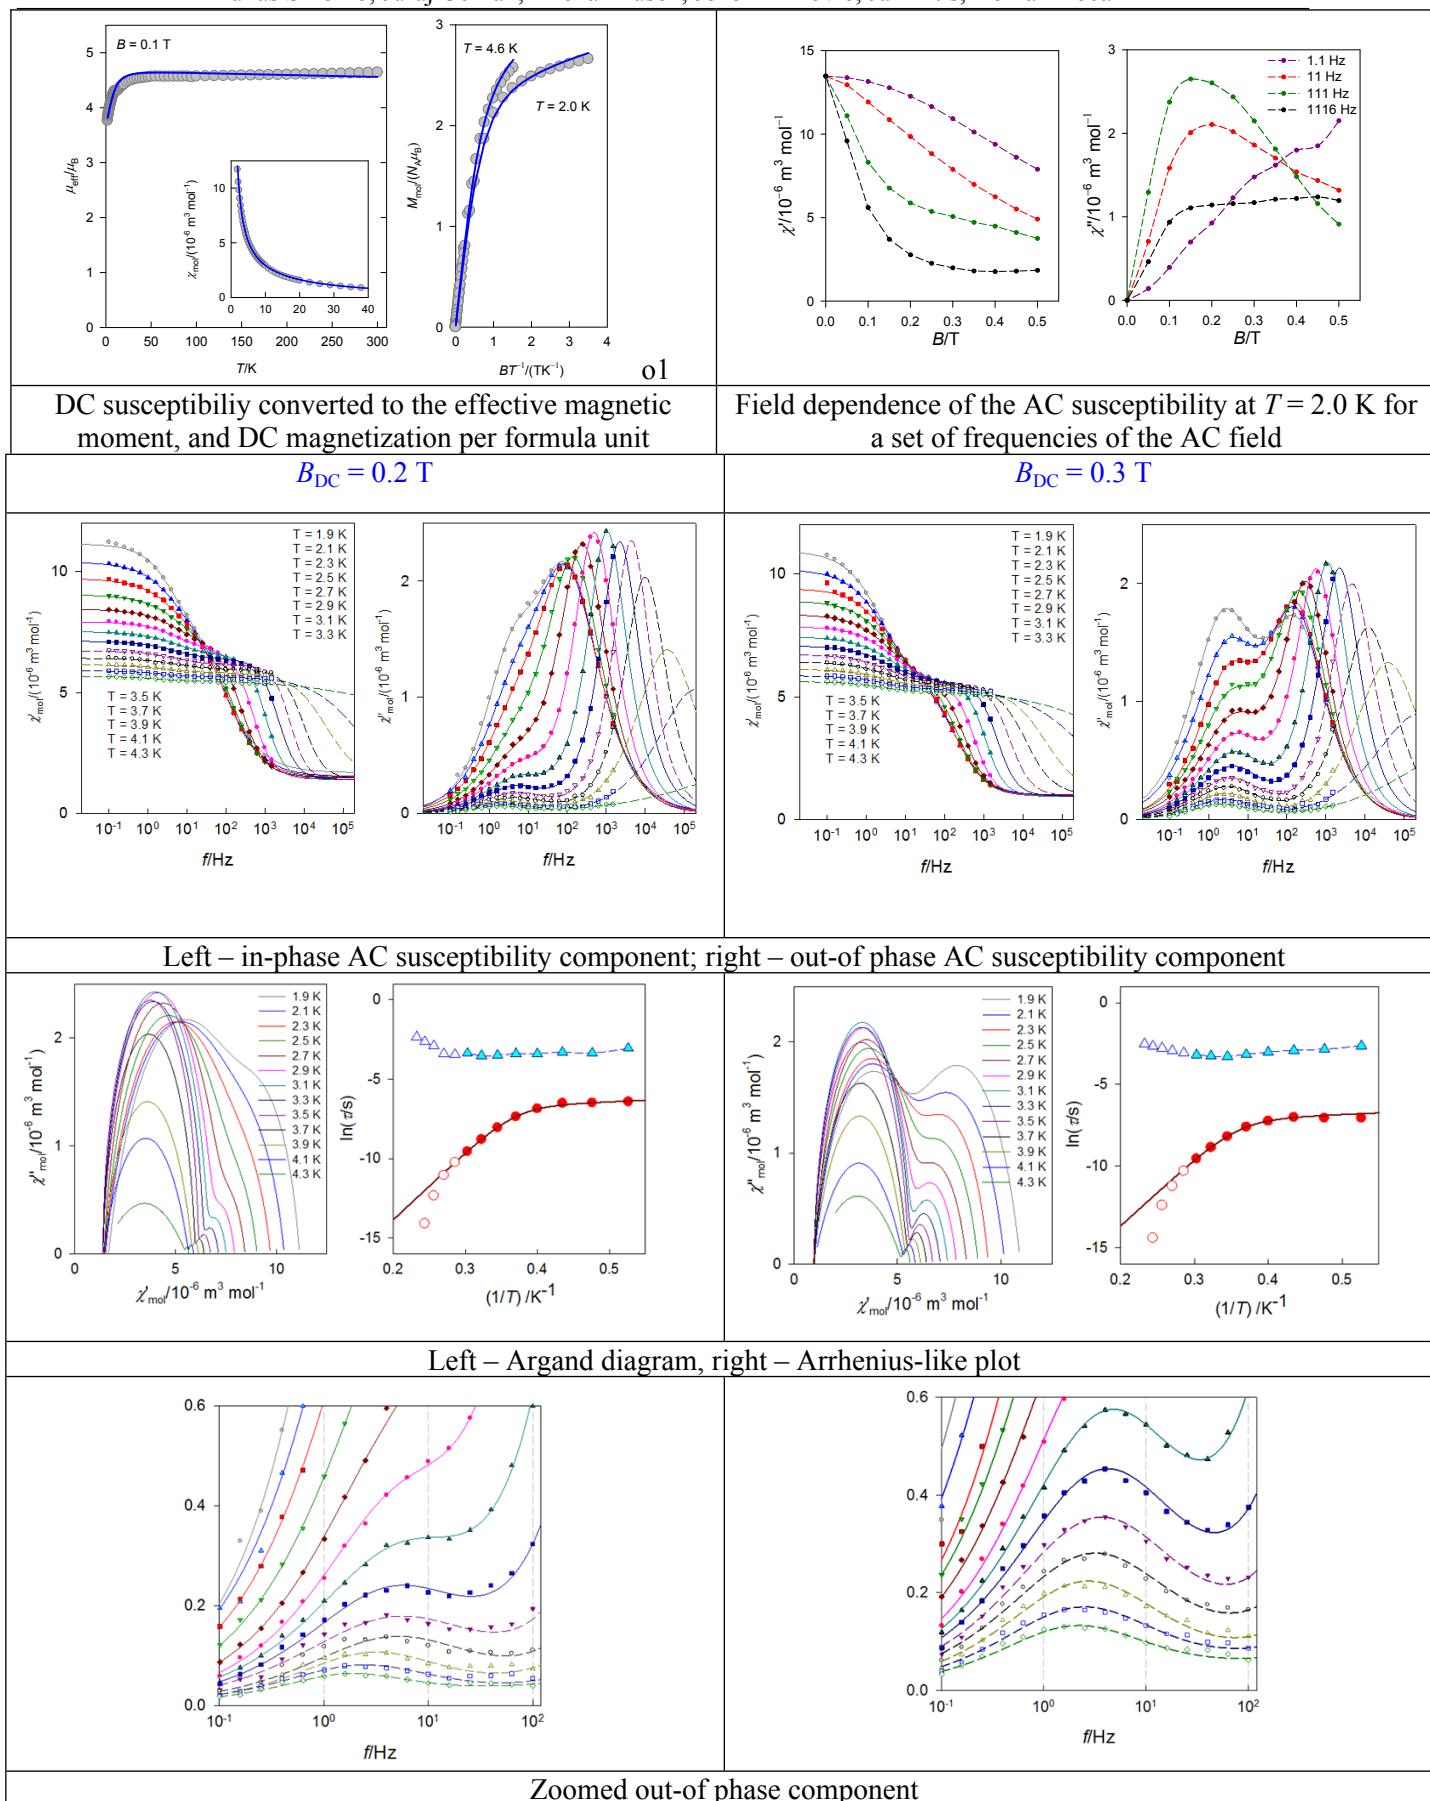Fig. S10 Magnetic data for **1** = [Co(biq)Cl<sub>2</sub>].

Two-component Debye model for AC susceptibility:

a) in phase susceptibility

$$\chi'(\omega) = \chi_s + (\chi_{T1} - \chi_s) \frac{1 + (\omega\tau_1)^{1-\alpha_1} \sin(\pi\alpha_1/2)}{1 + 2(\omega\tau_1)^{1-\alpha_1} \sin(\pi\alpha_1/2) + (\omega\tau_1)^{2-2\alpha_1}} + (\chi_{T2} - \chi_{T1}) \frac{1 + (\omega\tau_2)^{1-\alpha_2} \sin(\pi\alpha_2/2)}{1 + 2(\omega\tau_2)^{1-\alpha_2} \sin(\pi\alpha_2/2) + (\omega\tau_2)^{2-2\alpha_2}}$$

b) out of phase susceptibility

$$\chi''(\omega) = (\chi_{T1} - \chi_s) \frac{(\omega\tau_1)^{1-\alpha_1} \cos(\pi\alpha_1/2)}{1 + 2(\omega\tau_1)^{1-\alpha_1} \sin(\pi\alpha_1/2) + (\omega\tau_1)^{2-2\alpha_1}} + (\chi_{T2} - \chi_{T1}) \frac{(\omega\tau_2)^{1-\alpha_2} \cos(\pi\alpha_2/2)}{1 + 2(\omega\tau_2)^{1-\alpha_2} \sin(\pi\alpha_2/2) + (\omega\tau_2)^{2-2\alpha_2}}$$

for  $\omega = 2\pi f$ .**Table S11** Parameters of the extended Debye model for **1** (two relaxation processes) at  $B_{DC} = 0.2$  T. <sup>a</sup>

| T/K   | $\chi_s$ | $\chi_{T1}$ | $\alpha_1$ | $\tau_1 / 10^{-3}$ s | $\chi_{T2}$ | $\alpha_2$ | $\tau_2 / 10^{-6}$ s | $R(\chi')$ /% | $R(\chi'')$ /% |
|-------|----------|-------------|------------|----------------------|-------------|------------|----------------------|---------------|----------------|
| 1.9   | 1.67(6)  | 4.44(35)    | 0.20(3)    | 46.7(46)             | 11.14(3)    | 0.32(2)    | 1644(119)            | 0.64          | 1.8            |
| 2.1   | 1.52(3)  | 4.03(24)    | 0.30(2)    | 34.8(36)             | 10.39(2)    | 0.31(1)    | 1530(66)             | 0.23          | 1.2            |
| 2.3   | 1.48(2)  | 3.40(22)    | 0.32(2)    | 36.5(51)             | 9.70(2)     | 0.29(1)    | 1470(53)             | 0.32          | 0.72           |
| 2.5   | 1.47(3)  | 3.15(22)    | 0.33(4)    | 33.6(65)             | 9.03(3)     | 0.22(1)    | 1040(30)             | 0.44          | 1.8            |
| 2.7   | 1.46(3)  | 2.85(11)    | 0.31(3)    | 33.5(37)             | 8.44(2)     | 0.14(1)    | 630(10)              | 0.37          | 1.7            |
| 2.9   | 1.40(2)  | 2.60(5)     | 0.30(2)    | 20.6(17)             | 7.92(1)     | 0.07(1)    | 320(1)               | 0.29          | 0.87           |
| 3.1   | 1.40     | 2.41(2)     | 0.33(2)    | 29.5(13)             | 7.51(1)     | 0.04(1)    | 151(1)               | 0.26          | 0.71           |
| 3.3   | 1.40     | 2.17(3)     | 0.32(3)    | 34.4(29)             | 7.12(2)     | 0.04(1)    | 72(1)                | 0.45          | 1.2            |
| 3.5*  | 1.40     | 2.03(3)     | 0.36(3)    | 32.0(30)             | 6.73(1)     | 0.00(1)    | 36(1)                | 0.34          | 3.2            |
| 3.7*  | 1.40     | 1.86(3)     | 0.33(5)    | 33.6(43)             | 6.41(2)     | 0.07(2)    | 16(1)                | 0.42          | 4.8            |
| 3.9*  | 1.40     | 1.71(3)     | 0.26(7)    | 54.5(85)             | 6.13(1)     | 0.28(4)    | 4.37(74)             | 0.45          | 6.2            |
| 4.1*  | 1.40     | 1.64(3)     | 0.28(7)    | 70.4(121)            | 5.89(1)     | 0.41(6)    | 0.76(36)             | 0.35          | 8.9            |
| 4.3** | 1.40     | 1.53(4)     | 0.17(16)   | 95(23)               | 5.65(1)     | 0.71(9)    | 0.0026(74)           | 0.39          | 6.5            |

<sup>a</sup> SI unit for the molar magnetic susceptibility [ $10^{-6}$  m<sup>3</sup> mol<sup>-1</sup>]. Standard deviations in parentheses (last digit). R – discrepancy factor of the fit for dispersion  $\chi'$  and absorption  $\chi''$ , respectively.

Notes to the fitting procedure

The fitting is considered as reliable when experimental data of  $\chi''$  pass through both maxima.

\* If not, the points in the Arrhenius-like graph are marked by empty symbols and they do not enter the equation for the relaxation time. In such a case the adiabatic susceptibility  $\chi_s$  becomes unstable during the fitting procedure and correlated with the isothermal susceptibility  $\chi_{T1}$  for the first (faster) process; this needs to be fixed either to the best estimate or to the zero.

\*\* The fitting was finished for those temperatures when the standard deviations of parameters are higher than the absolute values of them.

Notice: 2.03(3) means  $2.03 \square 0.03$ ; 32.0(29) means  $32.0 \square 2.9$ ; 70.4(121) means  $70.4 \square 12.1$ .**Table S12** Parameters of the extended Debye model for **1** (two relaxation processes) at  $B_{DC} = 0.3$  T.

| T/K   | $\chi_s$ | $\chi_{T1}$ | $\alpha_1$ | $\tau_1 / 10^{-3}$ s | $\chi_{T2}$ | $\alpha_2$ | $\tau_2 / 10^{-6}$ s | $R(\chi')$ /% | $R(\chi'')$ /% |
|-------|----------|-------------|------------|----------------------|-------------|------------|----------------------|---------------|----------------|
| 1.9   | 0.92(6)  | 6.14(21)    | 0.30(1)    | 70.9(31)             | 10.94(4)    | 0.29(2)    | 859(37)              | 0.53          | 2.4            |
| 2.1   | 0.97(2)  | 5.53(9)     | 0.32(1)    | 57.3(15)             | 10.19(2)    | 0.25(1)    | 862(15)              | 0.30          | 0.64           |
| 2.3   | 0.92(9)  | 4.37(33)    | 0.27(3)    | 53.8(59)             | 9.39(6)     | 0.25(3)    | 893(57)              | 1.3           | 1.2            |
| 2.5   | 0.93(3)  | 4.06(10)    | 0.31(1)    | 47.8(21)             | 8.90(2)     | 0.19(1)    | 715(12)              | 0.41          | 1.3            |
| 2.7   | 0.99(2)  | 3.73(7)     | 0.33(1)    | 41.4(16)             | 8.35(2)     | 0.12(1)    | 495(5)               | 0.33          | 1.5            |
| 2.9   | 0.95(2)  | 3.24(5)     | 0.32(1)    | 37.6(9)              | 7.86(1)     | 0.07(1)    | 276(2)               | 0.28          | 0.95           |
| 3.1   | 0.95(5)  | 2.86(6)     | 0.33(1)    | 38.3(11)             | 7.44(1)     | 0.04(1)    | 143(2)               | 0.33          | 0.81           |
| 3.3   | 0.95     | 2.49(3)     | 0.34(2)    | 41.2(16)             | 7.07(1)     | 0.05(1)    | 71.1(6)              | 0.40          | 1.9            |
| 3.5*  | 0.95     | 2.16(3)     | 0.34(2)    | 45.7(21)             | 6.72(2)     | 0.08(1)    | 33.4(6)              | 0.38          | 2.7            |
| 3.7*  | 0.95     | 1.89(4)     | 0.33(3)    | 52.8(44)             | 6.41(2)     | 0.21(3)    | 13.2(10)             | 0.57          | 5.2            |
| 3.9*  | 0.95     | 1.66(3)     | 0.30(3)    | 61.3(49)             | 6.11(2)     | 0.31(4)    | 4.11(71)             | 0.46          | 6.0            |
| 4.1*  | 0.95     | 1.48(4)     | 0.30(5)    | 69.4(82)             | 5.85(2)     | 0.50(7)    | 0.55(33)             | 0.46          | 8.7            |
| 4.3** | 0.95     | 1.32(4)     | 0.27(5)    | 79.6(88)             | 5.61(1)     | 0.64(7)    | 0.032(42)            | 0.35          | 5.7            |

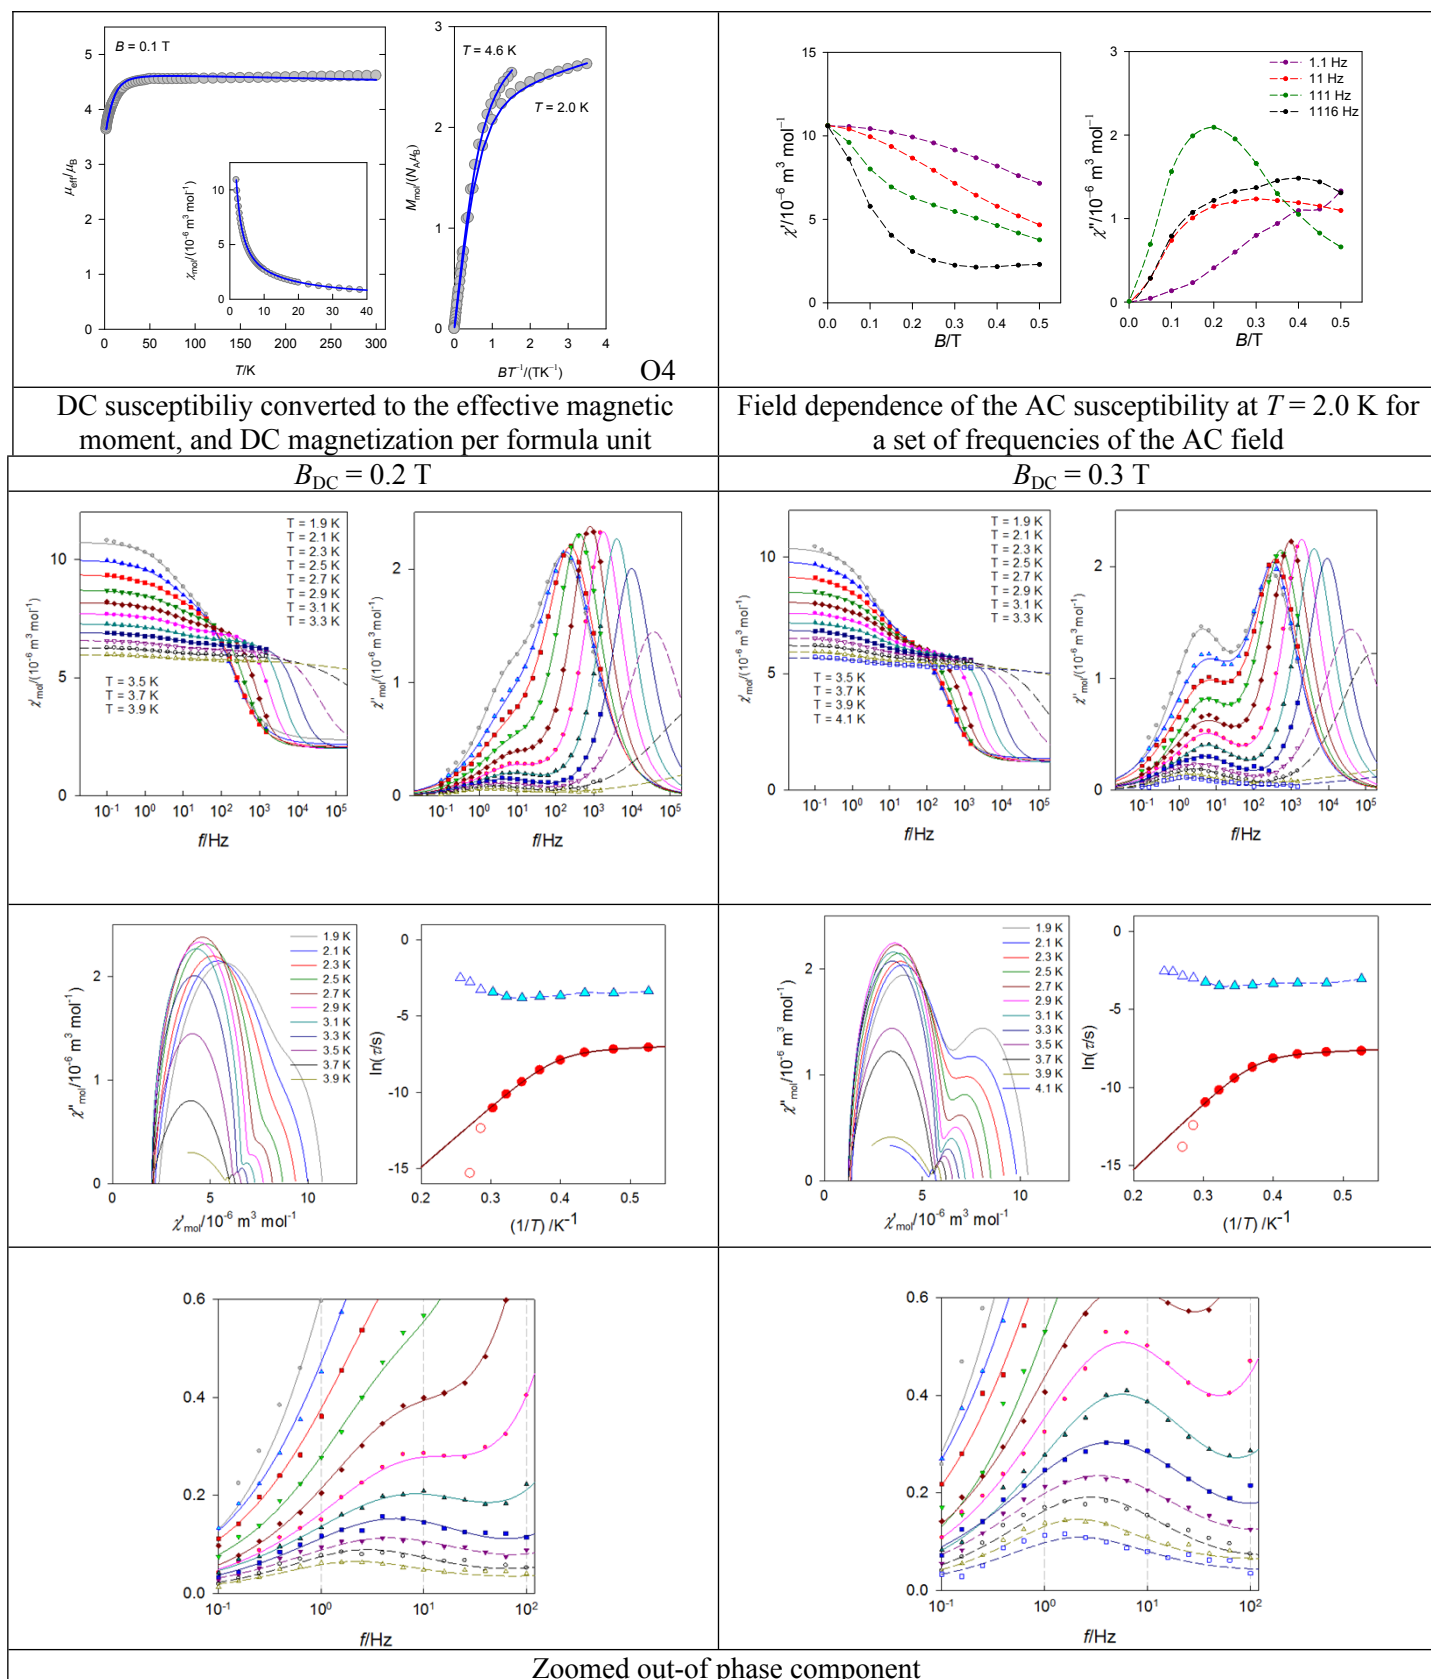Fig. S11 Magnetic data for **2** = [Co(biq)Br<sub>2</sub>].

**Table S13** Parameters of the extended Debye model for **2** (two relaxation processes) at  $B_{DC} = 0.2$  T.

| $T/K$ | $\chi_s$ | $\chi_{T1}$ | $\alpha_1$ | $\tau_1 / 10^{-3}$ s | $\chi_{T2}$ | $\alpha_2$ | $\tau_2 / 10^{-6}$ s | $R(\chi'')/\%$ | $R(\chi''')/\%$ |
|-------|----------|-------------|------------|----------------------|-------------|------------|----------------------|----------------|-----------------|
| 1.9   | 2.40(5)  | 4.77(21)    | 0.25(3)    | 32.1(31)             | 10.74(2)    | 0.25(1)    | 830(30)              | 0.49           | 1.7             |
| 2.1   | 2.17(4)  | 4.06(20)    | 0.34(3)    | 30.5(45)             | 9.99(2)     | 0.24(1)    | 768(22)              | 0.37           | 1.4             |
| 2.3   | 2.08(3)  | 3.68(15)    | 0.36(3)    | 30.9(45)             | 9.37(2)     | 0.19(1)    | 622(11)              | 0.32           | 1.6             |
| 2.5   | 2.05(4)  | 3.44(11)    | 0.35(3)    | 25.7(31)             | 8.71(2)     | 0.10(1)    | 377(5)               | 0.37           | 1.8             |
| 2.7   | 2.05(4)  | 3.19(8)     | 0.34(3)    | 24.0(19)             | 8.18(1)     | 0.04(1)    | 197(2)               | 0.33           | 1.4             |
| 2.9   | 2.00     | 2.93(4)     | 0.37(3)    | 22.0(20)             | 7.72(2)     | 0.02(1)    | 89.1(7)              | 0.42           | 0.98            |
| 3.1   | 2.00     | 2.77(2)     | 0.40(2)    | 24.5(15)             | 7.29(1)     | 0.02(1)    | 39.4(4)              | 0.23           | 1.3             |
| 3.3   | 2.00     | 2.57(2)     | 0.38(3)    | 32.4(26)             | 6.91(1)     | 0.05(2)    | 16.4(6)              | 0.26           | 2.9             |
| 3.5*  | 2.00     | 2.42(3)     | 0.38(5)    | 41.6(60)             | 6.56(2)     | 0.20(5)    | 4.96(82)             | 0.35           | 4.8             |
| 3.7*  | 2.00     | 2.27(3)     | 0.29(7)    | 62(10)               | 6.26(1)     | 0.51(8)    | 0.22(19)             | 0.31           | 10              |
| 3.9** | 2.00     | 2.14(6)     | 0.23(15)   | 82(14)               | 5.99(3)     | 0.80(11)   | 0.00002(16)          | 0.23           | 14              |

**Table S14** Parameters of the extended Debye model for **2** (two relaxation processes) at  $B_{DC} = 0.3$  T.

| $T/K$ | $\chi_s$ | $\chi_{T1}$ | $\alpha_1$ | $\tau_1 / 10^{-3}$ s | $\chi_{T2}$ | $\alpha_2$ | $\tau_2 / 10^{-6}$ s | $R(\chi'')/\%$ | $R(\chi''')/\%$ |
|-------|----------|-------------|------------|----------------------|-------------|------------|----------------------|----------------|-----------------|
| 1.9   | 1.36(7)  | 5.53(16)    | 0.28(1)    | 46.5(21)             | 10.42(3)    | 0.19(2)    | 467(13)              | 0.67           | 2.2             |
| 2.1   | 1.36(5)  | 5.24(17)    | 0.36(2)    | 36.3(23)             | 9.85(4)     | 0.14(2)    | 437(10)              | 0.58           | 2.1             |
| 2.3   | 1.30(5)  | 4.47(13)    | 0.35(2)    | 36.5(22)             | 9.19(3)     | 0.13(1)    | 384(7)               | 0.55           | 1.9             |
| 2.5   | 1.22(5)  | 3.56(9)     | 0.28(1)    | 35.3(15)             | 8.51(2)     | 0.11(1)    | 291(4)               | 0.43           | 1.9             |
| 2.7   | 1.22(6)  | 3.35(9)     | 0.36(1)    | 32.6(14)             | 8.10(2)     | 0.06(1)    | 165(2)               | 0.36           | 1.9             |
| 2.9   | 1.22(13) | 2.99(15)    | 0.35(1)    | 30.6(13)             | 7.62(2)     | 0.03(1)    | 81.5(29)             | 0.35           | 2.0             |
| 3.1   | 1.20     | 2.60(3)     | 0.35(1)    | 30.2(11)             | 7.20(1)     | 0.05(1)    | 38.4(5)              | 0.34           | 1.9             |
| 3.3   | 1.20     | 2.37(4)     | 0.40(2)    | 38.9(25)             | 6.89(2)     | 0.06(2)    | 17.3(8)              | 0.40           | 4.8             |
| 3.5*  | 1.20     | 2.07(4)     | 0.38(3)    | 49.9(42)             | 6.55(2)     | 0.27(5)    | 4.00(80)             | 0.43           | 4.7             |
| 3.7*  | 1.20     | 1.84(3)     | 0.32(3)    | 58.3(46)             | 6.22(1)     | 0.35(7)    | 1.00(49)             | 0.36           | 7.2             |
| 3.9** | 1.20     | 1.58(7)     | 0.25(7)    | 75.2(74)             | 5.96(3)     | 0.76(10)   | 0.00078(288)         | 0.33           | 8.5             |
| 4.1** | 1.20     | 1.48(10)    | 0.25(12)   | 77.5(117)            | 5.71(6)     | 0.80(21)   | 0.00001(17)          | 0.40           | 14              |

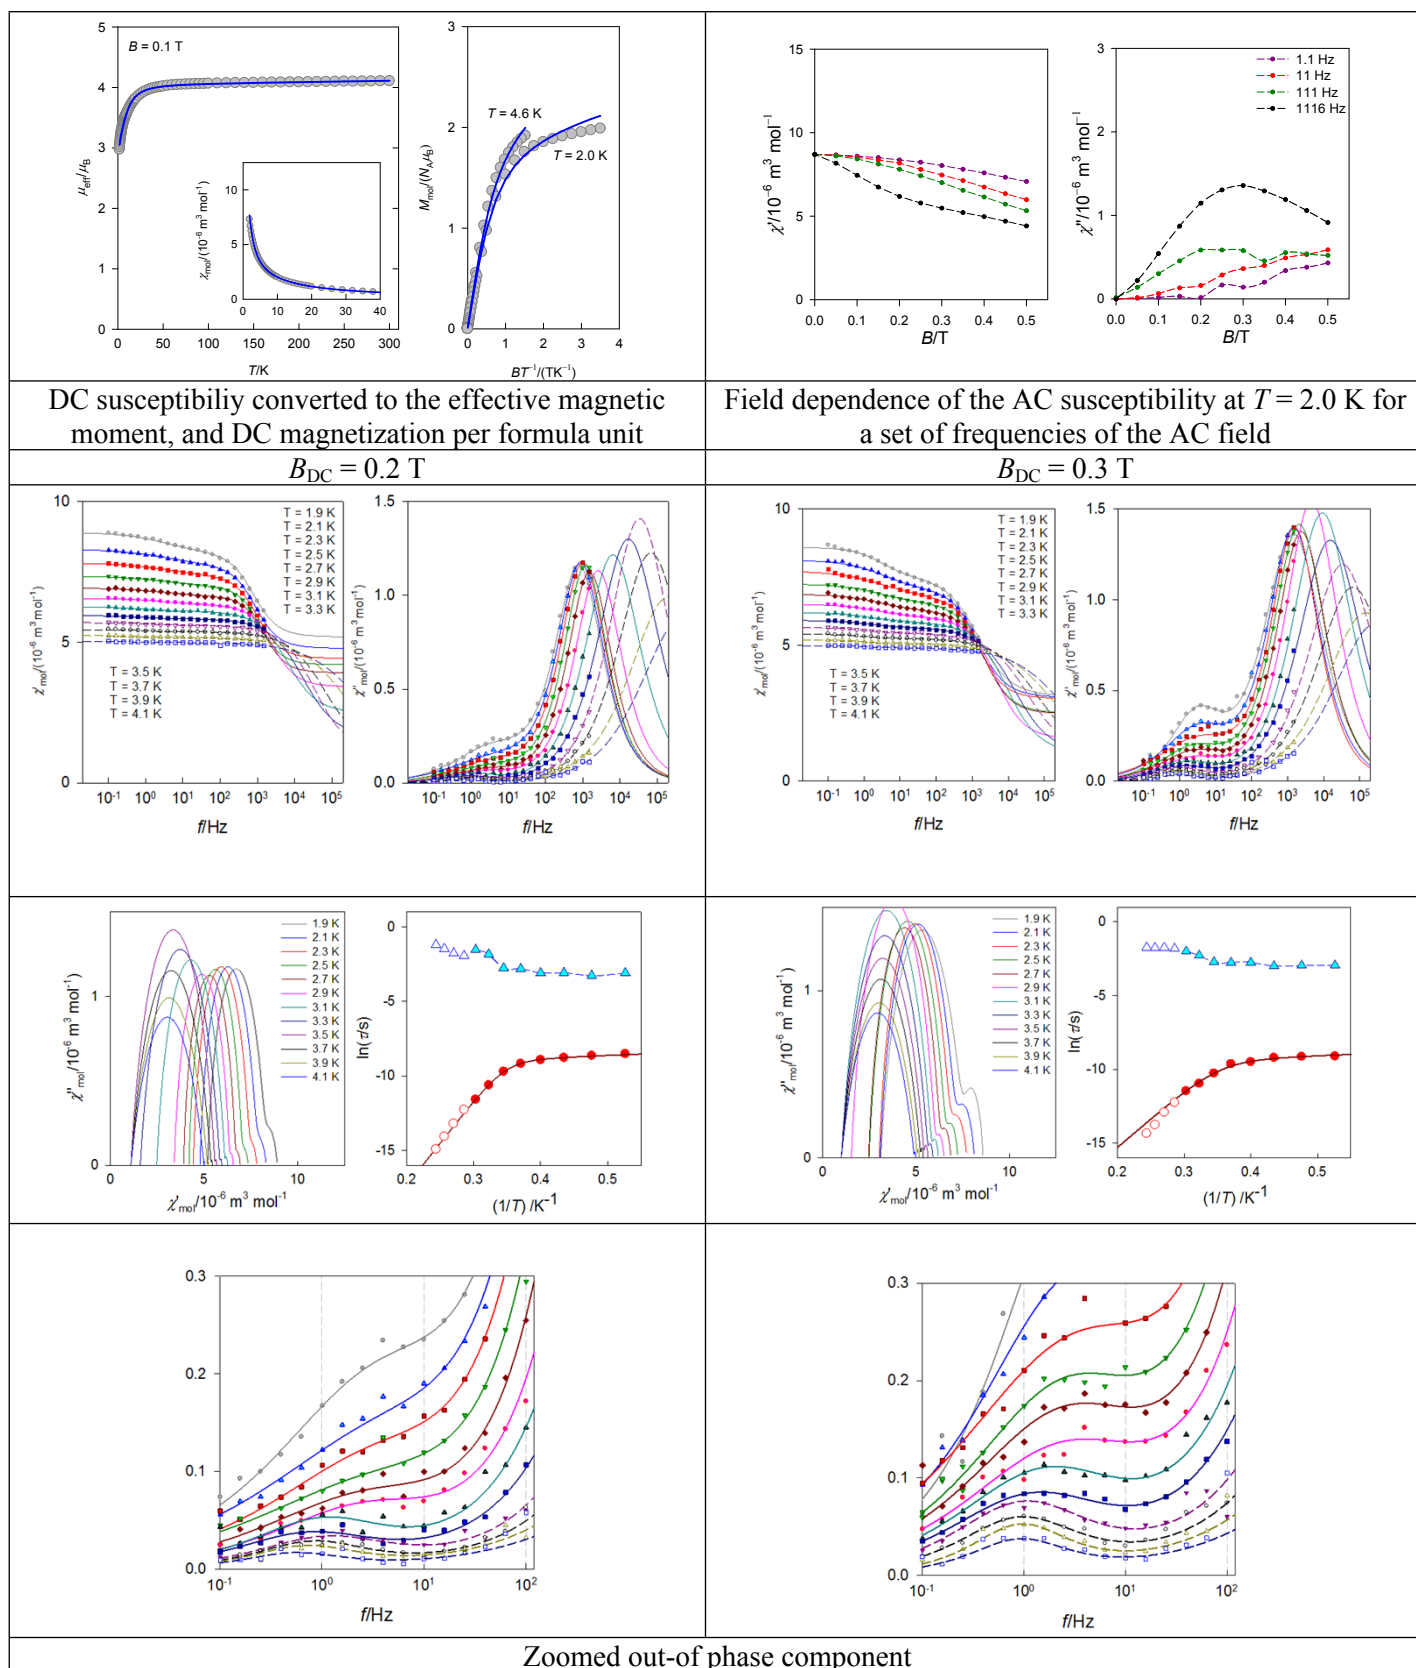Fig. S12 Magnetic data for **3** =  $[\text{Co}(\text{biq})\text{I}_2]$ .

**Table S15** Parameters of the extended Debye model for **3** (two relaxation processes) at  $B_{DC} = 0.2$  T.

| $T/K$ | $\chi_s$ | $\chi_{T1}$ | $\alpha_1$ | $\tau_1 / 10^{-3}$ s | $\chi_{T2}$ | $\alpha_2$ | $\tau_2 / 10^{-6}$ s | $R(\chi'')/\%$ | $R(\chi''')/\%$ |
|-------|----------|-------------|------------|----------------------|-------------|------------|----------------------|----------------|-----------------|
| 1.9   | 5.19(5)  | 5.93(10)    | 0.42(5)    | 45.4(75)             | 8.91(2)     | 0.17(2)    | 201(5)               | 0.26           | 2.2             |
| 2.1   | 4.78(5)  | 5.40(12)    | 0.49(6)    | 37.9(11)             | 8.31(3)     | 0.15(2)    | 178(4)               | 0.28           | 1.9             |
| 2.3   | 4.42(5)  | 4.87(9)     | 0.44(6)    | 46.0(98)             | 7.81(2)     | 0.15(1)    | 155(4)               | 0.25           | 1.4             |
| 2.5   | 4.19(6)  | 4.60(10)    | 0.49(8)    | 45.4(135)            | 7.36(2)     | 0.12(2)    | 133(4)               | 0.25           | 2.4             |
| 2.7   | 3.91(7)  | 4.19(9)     | 0.41(7)    | 59.7(130)            | 6.93(1)     | 0.13(1)    | 103(4)               | 0.26           | 1.3             |
| 2.9   | 3.42(10) | 3.63(11)    | 0.35(6)    | 64.2(105)            | 6.56(1)     | 0.17(1)    | 61.2(36)             | 0.17           | 2.1             |
| 3.1*  | 2.47(46) | 2.61(47)    | 0.22(12)   | 160(38)              | 6.25(1)     | 0.25(2)    | 24.6(58)             | 0.26           | 3.7             |
| 3.3*  | 1.60     | 1.70(2)     | 0.23(14)   | 215(63)              | 5.94(1)     | 0.30(1)    | 9.38(43)             | 0.28           | 3.5             |
| 3.5*  | 1.10     | 1.18(1)     | 0.16(15)   | 141(41)              | 5.67(1)     | 0.29(2)    | 4.69(41)             | 0.32           | 3.8             |
| 3.7*  | 1.10     | 1.16(1)     | 0.09(17)   | 170(49)              | 5.44(1)     | 0.37(2)    | 1.85(28)             | 0.26           | 7.7             |
| 3.9*  | 1.10     | 1.15(1)     | 0.04(20)   | 230(73)              | 5.23(1)     | 0.42(2)    | 0.784(179)           | 0.23           | 12              |
| 4.1*  | 1.10     | 1.13(1)     | 0          | 300(226)             | 5.02(1)     | 0.56(5)    | 0.334(201)           | 0.45           | 18              |

**Table S16** Parameters of the extended Debye model for **3** (two relaxation processes) at  $B_{DC} = 0.3$  T.

| $T/K$ | $\chi_s$ | $\chi_{T1}$ | $\alpha_1$ | $\tau_1 / 10^{-3}$ s | $\chi_{T2}$ | $\alpha_2$ | $\tau_2 / 10^{-6}$ s | $R(\chi'')/\%$ | $R(\chi''')/\%$ |
|-------|----------|-------------|------------|----------------------|-------------|------------|----------------------|----------------|-----------------|
| 1.9   | 3.11(19) | 4.20(24)    | 0.26(4)    | 51.8(43)             | 8.59(2)     | 0.30(2)    | 110(9)               | 0.45           | 2.5             |
| 2.1   | 3.08(15) | 4.14(20)    | 0.38(4)    | 51.2(61)             | 8.13(3)     | 0.30(2)    | 107(7)               | 0.38           | 3.1             |
| 2.3   | 3.03(22) | 4.02(31)    | 0.45(6)    | 49.8(121)            | 7.73(5)     | 0.19(4)    | 100(9)               | 0.64           | 2.7             |
| 2.5   | 2.49(14) | 3.16(17)    | 0.37(3)    | 63.1(62)             | 7.24(1)     | 0.23(2)    | 75.2(48)             | 0.30           | 1.6             |
| 2.7   | 2.46(21) | 3.06(24)    | 0.38(5)    | 62.7(92)             | 6.87(2)     | 0.21(2)    | 65.4(64)             | 0.38           | 2.7             |
| 2.9   | 1.53(37) | 2.01(39)    | 0.38(5)    | 65.1(89)             | 6.50(2)     | 0.23(2)    | 34.5(52)             | 0.29           | 2.2             |
| 3.1*  | 1.0      | 1.34(3)     | 0.32(7)    | 101(17)              | 6.19(2)     | 0.30(1)    | 17.4(6)              | 0.36           | 4.2             |
| 3.3*  | 1.0      | 1.25(3)     | 0.30(9)    | 134(29)              | 5.91(2)     | 0.24(2)    | 10.4(6)              | 0.41           | 4.1             |
| 3.5*  | 1.0      | 1.19(3)     | 0.20(13)   | 162(42)              | 5.64(2)     | 0.37(3)    | 4.74(67)             | 0.49           | 10.9            |
| 3.7*  | 1.0      | 1.14(2)     | 0.13(9)    | 175(29)              | 5.40(1)     | 0.41(2)    | 2.45(31)             | 0.28           | 8.3             |
| 3.9*  | 1.0      | 1.10(1)     | 0.00(13)   | 172(33)              | 5.18(1)     | 0.46(3)    | 1.05(25)             | 0.34           | 11.7            |
| 4.1*  | 1.0      | 1.07(1)     | 0.00(20)   | 176(50)              | 4.98(1)     | 0.47(4)    | 0.583(228)           | 0.25           | 25.5            |

**DC magnetic data fitting procedure**

Spin Hamiltonian of the form

$$\hat{H}_{k,l} = D(\hat{S}_z^2 - \hat{S}^2 / 3)\hbar^{-2} + E(\hat{S}_x^2 - \hat{S}_y^2)\hbar^{-2} \\ + \mu_B B_m (g_x \sin \vartheta_k \cos \varphi_l \hat{S}_x + g_y \sin \vartheta_k \sin \varphi_l \hat{S}_y + g_z \cos \vartheta_k \hat{S}_z)\hbar^{-1}$$

has been applied in interpreting the magnetic data. The zero-field splitting (ZFS) is described by two parameters:  $D$  – the axial ZFS parameter, and  $E$  – the rhombic ZFS one, respectively. The Zeeman term needs averaging over a number of grid points ( $k, l$ ) distributed uniformly over a sphere (210 points at the top hemisphere). The generated energy levels for three magnetic fields  $B_m$  enter the partition function from which the magnetization and magnetic susceptibility are obtained through the formulae of the statistical thermodynamics. The susceptibility data were corrected for the molecular-field correction ( $zj$ ) and the temperature-independent magnetism  $\chi_{\text{TIM}}$

$$\chi_{\text{corr}} = \chi_{\text{mol}} / [1 - (zj)\chi_{\text{mol}}] + \chi_{\text{TIM}}$$

The latter term accounts for the uncompensated underlying diamagnetism and the temperature-independent paramagnetism, along with the signal of the sample holder. The susceptibility and magnetization data sets have been fitted simultaneously by applying a joint error functional

$$F_2 = w_1 \left[ (1/N) \sum_i \left| \frac{\chi_i^c - \chi_i^o}{\chi_i^o} \right| \right] + w_2 \left[ (1/K) \sum_j \left| \frac{M_j^c - M_j^o}{M_j^o} \right| \right]$$

where  $w_1$  and  $w_2$  are postulated weights of the two data-sets. An advanced fitting procedure using a genetic algorithm has been applied.



DC magnetic data fitting with final negative  $D$  values

Table S17 Spin Hamiltonian parameters

| Complex  | $g_{\text{iso}}$ | $D/hc$<br>/cm <sup>-1</sup> | $E/hc$<br>/cm <sup>-1</sup> | $\chi_{\text{TIM}}$<br>/10 <sup>-9</sup> m <sup>3</sup> mol <sup>-1</sup> | $zj/hc$<br>/cm <sup>-1</sup> | $R(\chi)$ | $R(M)$ |
|----------|------------------|-----------------------------|-----------------------------|---------------------------------------------------------------------------|------------------------------|-----------|--------|
| <b>1</b> | 2.444            | -9.00                       | -                           | -10.99                                                                    | -0.02                        | 0.046     | 0.025  |
| <b>2</b> | 2.363            | -11.52                      | -                           | -4.12                                                                     | -0.01                        | 0.015     | 0.056  |
| <b>3</b> | 2.112            | -9.25                       | -                           | -0.69                                                                     | -0.04                        | 0.011     | 0.042  |

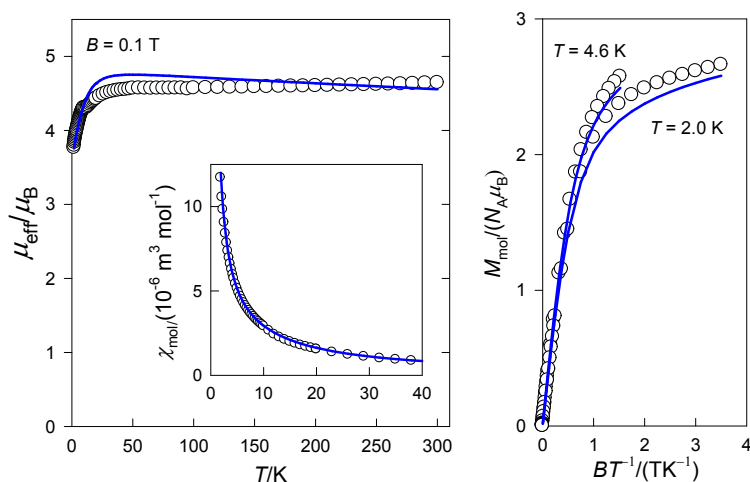Fig. S13 Best negative  $D$ -value fit of the DC magnetic data for **1**.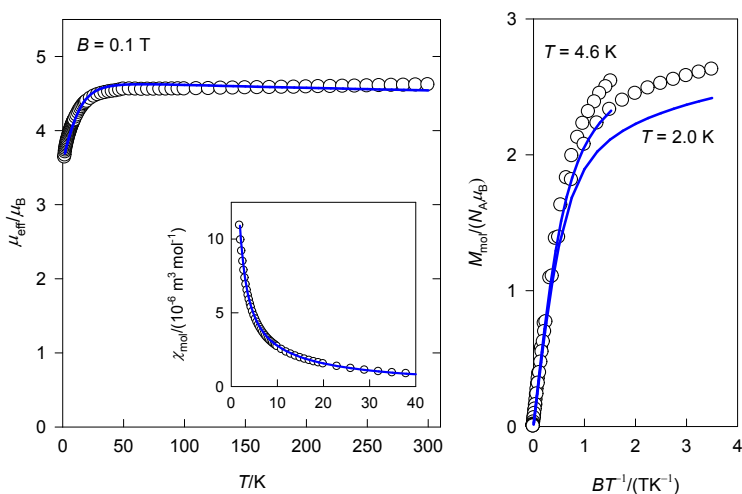Fig. S14 Best negative  $D$ -value fit of the DC magnetic data for **2**.

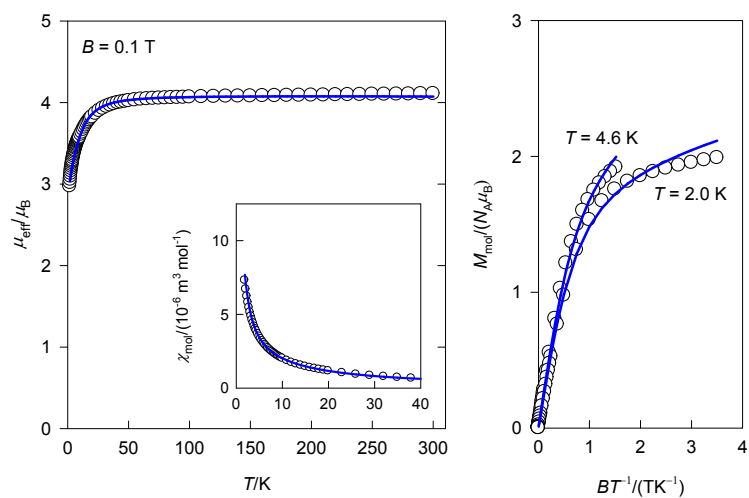

**Fig. S15** Best negative  $D$ -value fit of the DC magnetic data for **3**.

**Magnetic hyperfine structure for complex 1**

-----  
 Nucleus 0Co: A:ISTP= 59 I= 3.5 P=125.8968 MHz/au\*\*3  
 Q:ISTP= 59 I= 3.5 Q= 0.3800 barn  
 -----

ZORA HFC tensor (only A(iso) and A(dip) are corrected)

Raw HFC matrix (all values in MHz):

|          |           |          |
|----------|-----------|----------|
| -36.7006 | 51.9452   | -3.8193  |
| 52.0685  | -116.3598 | -19.2705 |
| -3.8466  | -19.2553  | -40.5104 |

A(FC) -132.4420 -132.4420 -132.4420

A(SD) 45.2099 16.9425 -62.1524

A(SO) 80.6611 72.8958 50.1981 A(PC) = 67.9183

A(Tot) -6.5709 -42.6036 -144.3963 A(iso)= -64.5236

Orientation:

X 0.8215471 -0.3796460 -0.4253579

Y 0.4502755 -0.0256002 0.8925226

Z -0.3497319 -0.9247776 0.1499135

**Magnetic hyperfine structure for complex 2**

-----  
 Nucleus 2Co: A:ISTP= 59 I= 3.5 P=125.8968 MHz/au\*\*3  
 Q:ISTP= 59 I= 3.5 Q= 0.3800 barn  
 -----

ZORA HFC tensor (only A(iso) and A(dip) are corrected)

Raw HFC matrix (all values in MHz):

|          |           |          |
|----------|-----------|----------|
| -28.6726 | -50.9393  | 3.8706   |
| -51.5344 | -104.4478 | -19.9140 |
| 4.2836   | -20.0672  | -35.8193 |

A(FC) -128.5796 -128.5796 -128.5796

A(SD) 40.8689 14.8904 -55.7592

A(SO) 89.3705 76.0472 51.3815 A(PC) = 72.2664

A(Tot) 1.6597 -37.6421 -132.9573 A(iso)= -56.3132

Orientation:

X 0.8217454 0.3755206 0.4286243

Y -0.4591949 -0.0090572 0.8882894

Z 0.3374531 -0.9267698 0.1649945

**Magnetic hyperfine structure for complex 3**

---

Nucleus 2Co: A:ISTP= 59 I= 3.5 P=125.8968 MHz/au\*\*3  
Q:ISTP= 59 I= 3.5 Q= 0.3800 barn

---

ZORA HFC tensor (only A(iso) and A(dip) are corrected)

Raw HFC matrix (all values in MHz):

|          |          |          |
|----------|----------|----------|
| -10.3378 | -51.5964 | 5.3985   |
| -53.5521 | -88.6422 | -20.9859 |
| 6.8063   | -22.2006 | -25.2497 |

A(FC) -122.1247 -122.1247 -122.1247

A(SD) 36.0416 12.7297 -48.7713

A(SO) 107.1352 82.1614 52.8478 A(PC) = 80.7148

---

A(Tot) 21.0521 -27.2336 -118.0482 A(iso)= -41.4099

Orientation:

|   |            |            |           |
|---|------------|------------|-----------|
| X | 0.8068735  | 0.4155197  | 0.4198792 |
| Y | -0.4552053 | -0.0156526 | 0.8902489 |
| Z | 0.3764882  | -0.9094495 | 0.1765171 |

**Table S18** Mononuclear Co(II) SMMs with positive *D* values

| Compound                                                                                                               | Chromophore                         | <i>D</i> /cm <sup>-1</sup> | <i>U</i> /cm <sup>-1</sup><br>( <i>B</i> <sub>DC</sub> /T) | Ref. |
|------------------------------------------------------------------------------------------------------------------------|-------------------------------------|----------------------------|------------------------------------------------------------|------|
| [CoL1Cl <sub>2</sub> ]                                                                                                 | {CoN <sub>3</sub> Cl <sub>2</sub> } | 151                        | 9.4 (0.1)                                                  | [1]  |
| [Co( <i>terpy</i> )Cl <sub>2</sub> ]                                                                                   | {CoN <sub>3</sub> Cl <sub>2</sub> } | 100                        | 19.4 (0.06)                                                | [2]  |
| <i>cis</i> -[Co( <i>dmphen</i> ) <sub>2</sub> (NCS) <sub>2</sub> ]                                                     | {CoN <sub>6</sub> }                 | 98                         | 18.1 (0.25)                                                | [3]  |
| [Co( <i>acac</i> ) <sub>2</sub> (H <sub>2</sub> O) <sub>2</sub> ]                                                      | {CoO <sub>6</sub> }                 | 57                         | ~14 - 17                                                   | [4]  |
| [Co( <i>abpt</i> ) <sub>2</sub> ( <i>tcm</i> ) <sub>2</sub> ]                                                          | {CoN <sub>6</sub> }                 | 48                         | 59.9 (0.3)                                                 | [5]  |
| [Co(μ-L2)(μ-OAc)Y(NO <sub>3</sub> ) <sub>2</sub> ]                                                                     | {CoO <sub>3</sub> N <sub>3</sub> }  | 41.7                       | 15.7 (0.1)                                                 | [6]  |
| [Co(H <sub>2</sub> <i>dapb</i> )(H <sub>2</sub> O)(NO <sub>3</sub> )](NO <sub>3</sub> )                                | {CoO <sub>4</sub> N <sub>3</sub> }  | 32.4                       | 56.3 (0.1)                                                 | [7]  |
| [(L3) <sub>4</sub> Co <sup>II</sup> Co <sup>III</sup> <sub>2</sub> (H <sub>2</sub> O) <sub>2</sub> ](NO <sub>3</sub> ) | {CoO <sub>4</sub> N <sub>2</sub> }  | 31.9                       | 5.6 (0.1)                                                  | [8]  |
| [Co( <i>dapb</i> )( <i>im</i> ) <sub>2</sub> ]·H <sub>2</sub> O                                                        | {CoO <sub>2</sub> N <sub>5</sub> }  | 24.8                       | 62.3 (0.1)                                                 | [7]  |
| [CoL4(H <sub>2</sub> O) <sub>2</sub> ]Cl <sub>2</sub> ·4H <sub>2</sub> O                                               | {CoO <sub>2</sub> N <sub>5</sub> }  | 24.6                       | 20.7 (0.1)                                                 | [7]  |
| K[Co(N[CH <sub>2</sub> C(O)NC(CH <sub>3</sub> ) <sub>3</sub> ]) <sub>3</sub> ]                                         | {CoN <sub>4</sub> }                 | 16                         | 8.7 (0.15)                                                 | [9]  |
| [CoL5Cl <sub>2</sub> (MeCN)]                                                                                           | {CoONCl <sub>2</sub> }              | 15.6                       | 10.3 (0.25)                                                | [10] |
| [CoCl(3G)](CF <sub>3</sub> SO <sub>3</sub> )                                                                           | {CoN <sub>3</sub> Cl}               | 12.7                       | 24 (0.15)                                                  | [11] |
| [CoL5Br <sub>2</sub> (MeCN)]                                                                                           | {CoONBr <sub>2</sub> }              | 11.2                       | 8.2 (0.25)                                                 | [10] |
| [Co( <i>dmphen</i> )Br <sub>2</sub> ]                                                                                  | {CoN <sub>2</sub> Br <sub>2</sub> } | 10.6                       | 22.9 (0.1)                                                 | [12] |

L1 = 4'-1-heptynyl-2',6'-dipyrazolyl-pyridine; *terpy* = terpyridine; *dmphen* = 2,9-dimethyl-1,10-phenanthroline; *abpt* = 4-amino-3,5-bis(2-pyridyl)-1,2,4-triazole; *tcm* = tricyanomethanide anion; H2L2 = N,N',N''-trimethyl-N,N''-bis(2-hydroxy-3-methoxy-5-methylbenzyl)-diethylenetriamine; H2dapb = 2,6-diacetylpyridine bis(benzoyl hydrazine); HL3 = (E)-N'-(pyridin-2-ylmethylene)pyrazine-2-carbohydrazide; L4 = 2,13-dimethyl-3,6,9,12-tetraaza-1(2,6)-pyridinacyclotridecaphane-2,12-diene, *im* = imidazole; L5 = 2,3-diphenyl-1,2,3,4-tetrazolium-5-olate; 3G = 1,1,1-tris-[2N-(1,1,3,3-tetramethylguanidino)methyl]ethane.

## References:

- [1] C. Rajnak, J. Titiš, O. Fuhr, M. Ruben, R. Boca, *Inorg. Chem.* 53 (2014)8200–8202.  
 [2] F. Habib, O.R. Luca, V. Vieru, M. Shiddiq, I. Korobkov, S.I. Gorelsky, M.K. Takase, L.F. Chibotaru, S. Hill, R.H. Crabtree, M. Murugesu, *Angew. Chem. Int. Ed. Engl.* 52 (2013) 11290–11293.

- 
- [3] J. Vallejo, I. Castro, R. Ruiz-Garcia, J. Cano, M. Julve, F. Lloret, G. De Munno, W. Wernsdorfer, E. Pardo, *J. Am. Chem. Soc.*, 134 (2012) 15704-15707.
- [4] S. Gomez-Coca, A. Urtizbarea, E. Cremades, P.J. Alonso, A. Camón, E. Ruiz, F. Luis, *Nat. Commun.*, 5 (2014) 4300.
- [5] R. Herchel, L. Váhovská, I. Potocnák, Z. Trávníček, *Inorg. Chem.*, 53 (2014) 5896-5898.
- [6] E. Colacio, J. Ruiz, E. Ruiz, E. Cremades, J. Krzystek, S. Carretta, J. Cano, T. Guidi, W. Wernsdorfer, E.K. Brechin, *Angew. Chem. Int. Ed.*, 52 (2013) 9130-9134.
- [7] X.-C. Huang, C. Zhou, D. Shao, X.-Y. Wang, *Inorg. Chem.*, 53 (2014) 12671-12673.
- [8] D. Wu, X. Zhang, P. Huang, W. Huang, M. Ruan, Z.W. Ouyang, *Inorg. Chem.*, 52 (2013) 10976-10982.
- [9] S. Gómez-Coca, E. Cremades, N. Aliaga-Alcalde, E. Ruiz, *J. Am. Chem. Soc.*, 135 (2013) 7010-7018.
- [10] S. Vaidya, A. Upadhyay, S.K. Singh, T. Gupta, S. Tewary, S.K. Langley, J.P.S. Walsh, K.S. Murray, G. Rajaraman, M. Shanmugam, *Chem. Commun.*, *Chem. Commun.*, 2015, 51, 3739 - 3742.
- [11] J.M. Zadrozny, J. Liu, N.A. Piro, C.J. Chang, S. Hill, J.R. Long, *Chem. Commun.*, 48 (2012) 3927-3929.
- [12] W. Huang, T. Liu, D. Wu, J. Cheng, Z.W. Ouyang, C. Duan, *Dalton Trans.*, 42 (2013) 15326-15331.
